**Statement of Ownership, Management, and Circulation**  
**(All Periodicals Publications Except Requester Publications)**

PS Form 3526

|                                                                                                                                                                                                                                                                                                                                                                                                                                                                                                                                                                         |                                                                                          |                                           |                                                                 |
|-------------------------------------------------------------------------------------------------------------------------------------------------------------------------------------------------------------------------------------------------------------------------------------------------------------------------------------------------------------------------------------------------------------------------------------------------------------------------------------------------------------------------------------------------------------------------|------------------------------------------------------------------------------------------|-------------------------------------------|-----------------------------------------------------------------|
| 1. Publication Title<br>AMERICAN PSYCHIATRIC ASSOCIATION/<br>AMERICAN JOURNAL OF PSYCHIATRY<br>(THE)                                                                                                                                                                                                                                                                                                                                                                                                                                                                    | 2. Publication Number<br>20200                                                           | ISSN<br>29530                             | 3. Filing Date<br>09/18/2018                                    |
| 4. Issue Frequency<br>MONTHLY                                                                                                                                                                                                                                                                                                                                                                                                                                                                                                                                           | 5. Number of Issues Published Annually<br>12                                             | 6. Annual Subscription Price<br>\$ 333.00 |                                                                 |
| 7. Complete Mailing Address of Known Office of Publication<br>800 MAINE AVE SW STE 900<br>WASHINGTON, VA, DC 20024-2812                                                                                                                                                                                                                                                                                                                                                                                                                                                 |                                                                                          |                                           | Contact Person<br>BRIAN COLE<br><br>Telephone<br>(202) 459-9750 |
| 8. Complete Mailing Address of Headquarters or General Business Office of Publisher<br>800 Maine Avenue, S.W., Suite 900<br>Washington, DC 20024-2812                                                                                                                                                                                                                                                                                                                                                                                                                   |                                                                                          |                                           |                                                                 |
| 9. Full Names and Complete Mailing Addresses of Publisher, Editor, and Managing Editor                                                                                                                                                                                                                                                                                                                                                                                                                                                                                  |                                                                                          |                                           |                                                                 |
| Publisher (Name and complete mailing address)<br>John McDuffie<br>800 Maine Avenue, S.W., Suite 900<br>Washington, DC 20024-2812                                                                                                                                                                                                                                                                                                                                                                                                                                        |                                                                                          |                                           |                                                                 |
| Editor (Name and complete mailing address)<br>Robert Freedman, M.D.<br>800 Maine Avenue, S.W., Suite 900<br>Washington, DC 20024-2812                                                                                                                                                                                                                                                                                                                                                                                                                                   |                                                                                          |                                           |                                                                 |
| Managing Editor (Name and complete mailing address)<br>Michael Roy<br>800 Maine Avenue, S.W., Suite 900<br>Washington, DC 20024-2812                                                                                                                                                                                                                                                                                                                                                                                                                                    |                                                                                          |                                           |                                                                 |
| 10. Owner (Do not leave blank. If the publication is owned by a corporation, give the name and address of the corporation immediately followed by the names and addresses of all stockholders owning or holding 1 percent or more of the total amount of stock. If not owned by a corporation, give names and addresses of the individual owners. If owned by a partnership or other unincorporated firm, give its name and address as well as those of each individual owner. If the publication is published by a nonprofit organization, give its name and address.) |                                                                                          |                                           |                                                                 |
| Full Name<br>American Psychiatric Assoc.                                                                                                                                                                                                                                                                                                                                                                                                                                                                                                                                | Complete Mailing Address<br>800 Maine Avenue, S.W., Suite 900, Washington, DC 20024-2812 |                                           |                                                                 |
| 11. Known Bondholders, Mortgagees, and Other Security Holders Owning or Holding 1 Percent or More of Total Amount of Bonds, Mortgages, or Other Securities. If none, check box <input checked="" type="checkbox"/> None                                                                                                                                                                                                                                                                                                                                                 |                                                                                          |                                           |                                                                 |
| Full Name                                                                                                                                                                                                                                                                                                                                                                                                                                                                                                                                                               | Complete Mailing Address                                                                 |                                           |                                                                 |
| 12. Tax Status (For completion by nonprofit organizations authorized to mail at nonprofit rates)<br>The purpose, function, and nonprofit status of this organization and the exempt status for federal income tax purposes:<br><input checked="" type="checkbox"/> Has Not Changed During Preceding 12 Months<br><input type="checkbox"/> Has Changed During Preceding 12 Months (Publisher must submit explanation of change with this statement)                                                                                                                      |                                                                                          |                                           |                                                                 |

PS Form 3526, September 2007 (Page 1)

PRIVACY NOTICE: See our privacy policy on [www.usps.com](http://www.usps.com)

|                                                                                                                                                                                                                                                                                                                                                        |                                                             |                                                                |
|--------------------------------------------------------------------------------------------------------------------------------------------------------------------------------------------------------------------------------------------------------------------------------------------------------------------------------------------------------|-------------------------------------------------------------|----------------------------------------------------------------|
| 13. Publication Title<br>AMERICAN PSYCHIATRIC ASSOCIATION/AMERICAN<br>JOURNAL OF PSYCHIATRY (THE)                                                                                                                                                                                                                                                      | 14. Issue Date for Circulation Data Below<br>09/01/2018     |                                                                |
| 15. Extend and Nature of Circulation                                                                                                                                                                                                                                                                                                                   | Average No. Copies Each Issue<br>During Preceding 12 Months | No. Copies of Single Issue<br>Published Nearest to Filing Date |
| a. Total Numbers of Copies (Net press run)                                                                                                                                                                                                                                                                                                             | 29107                                                       | 28554                                                          |
| b. Paid Circulation (By Mail and Outside the Mail)                                                                                                                                                                                                                                                                                                     |                                                             |                                                                |
| (1) Mailed Outside County Paid Subscriptions Stated on PS Form 3541 (include paid distribution above nominal rate, advertiser's proof copies, and exchange copies)                                                                                                                                                                                     | 26164                                                       | 25967                                                          |
| (2) Mailed In-County Paid Subscriptions Stated on PS Form 3541 (include paid distribution above nominal rate, advertiser's proof copies, and exchange copies)                                                                                                                                                                                          | 0                                                           | 0                                                              |
| (3) Paid Distribution Outside the Mails Including Sales Through Dealers and Carriers, Street Vendors, Counter Sales, and Other Paid Distribution Outside USPS                                                                                                                                                                                          | 2067                                                        | 1996                                                           |
| (4) Paid Distribution by Other Classes of Mail Through the USPS (e.g. First-Class Mail)                                                                                                                                                                                                                                                                | 0                                                           | 0                                                              |
| c. Total Paid Distribution (Sum of 15b (1), (2), (3), (4))                                                                                                                                                                                                                                                                                             | 28231                                                       | 27863                                                          |
| d. Free or Nominal Rate Distribution (By Mail and Outside the Mail)                                                                                                                                                                                                                                                                                    |                                                             |                                                                |
| (1) Free or Nominal Rate Outside County Copies included on PS Form 3541                                                                                                                                                                                                                                                                                | 124                                                         | 116                                                            |
| (2) Free or Nominal Rate In-County Copies included on PS Form 3541                                                                                                                                                                                                                                                                                     | 0                                                           | 0                                                              |
| (3) Free or Nominal Rate Copies Mailed at Other Classes Through the USPS (e.g. First-Class Mail)                                                                                                                                                                                                                                                       | 0                                                           | 0                                                              |
| (4) Free or Nominal Rate Distribution Outside the Mail (Carriers or other means)                                                                                                                                                                                                                                                                       | 95                                                          | 95                                                             |
| e. Total Free or Nominal Rate Distribution (Sum of 15d (1), (2), (3), (4))                                                                                                                                                                                                                                                                             | 219                                                         | 211                                                            |
| f. Total Distribution (Sum of 15c and 15e)                                                                                                                                                                                                                                                                                                             | 28450                                                       | 28074                                                          |
| g. Copies not Distributed                                                                                                                                                                                                                                                                                                                              | 0                                                           | 0                                                              |
| h. Total (Sum of 15f and 15g)                                                                                                                                                                                                                                                                                                                          | 28450                                                       | 28074                                                          |
| i. Percent Paid ((15c / 15f) times 100)                                                                                                                                                                                                                                                                                                                | 99.23 %                                                     | 99.25 %                                                        |
| 16. If total circulation includes electronic copies, report that circulation on lines below.                                                                                                                                                                                                                                                           |                                                             |                                                                |
| a. Paid Electronic Copies                                                                                                                                                                                                                                                                                                                              | 0                                                           | 0                                                              |
| b. Total Paid Print Copies (Line 15c) + Paid Electronic Copies                                                                                                                                                                                                                                                                                         | 0                                                           | 0                                                              |
| c. Total Print Distribution (Line 15f) + Paid Electronic Copies                                                                                                                                                                                                                                                                                        | 0                                                           | 0                                                              |
| d. Percent Paid (Both Print and Electronic Copies)                                                                                                                                                                                                                                                                                                     | 0.00 %                                                      | 0.00 %                                                         |
| <input type="checkbox"/> I certify that 50% of all my distributed copies (Electronic and Print) are paid above a nominal price.                                                                                                                                                                                                                        |                                                             |                                                                |
| 17. Publication of Statement of Ownership<br><input checked="" type="checkbox"/> If the publication is a general publication, publication of this statement is required. Will be printed in the 11/01/2018 issue of this publication. <input type="checkbox"/> Publication not required.                                                               |                                                             |                                                                |
| 18. Signature and Title of Editor, Publisher, Business Manager, or Owner                                                                                                                                                                                                                                                                               | Title                                                       | Date                                                           |
| Brian Cole                                                                                                                                                                                                                                                                                                                                             | Publishing Systems Manager                                  | 09/18/2018 12:55:44 PM                                         |
| I certify that all information furnished on this form is true and complete. I understand that anyone who furnishes false or misleading information on this form or who omits material or information requested on the form may be subject to criminal sanctions (including fines and imprisonment) and/or civil sanctions (including civil penalties). |                                                             |                                                                |

PS Form 3526, September 2007 (Page 2)

PRIVACY NOTICE: See our privacy policy on [www.usps.com](http://www.usps.com)

# Psychiatrists

## MINNESOTA

HealthPartners is one of the Upper Midwest's leading multispecialty physician groups. We have practice opportunities for talented, caring BC/BE psychiatrists in metropolitan Minneapolis/St. Paul and central Minnesota.

## Inpatient/Adult

- **Regions Hospital (St. Paul, MN)**

Our state-of-the-art inpatient psychiatric facilities allow our team of psychiatrists, residents, therapists, social workers, NPs/PAs and nursing staff to provide exceptional care to adult psychiatric inpatients. Our Regions care model schedule is 7 days on/7 days off.

## Outpatient/Adult

- **Central Minnesota (Sartell/St. Cloud)**

- **Metropolitan Minneapolis/St. Paul**

These teams provide integrated outpatient mental health services in our primary care and outpatient specialty clinics located within a variety of urban, suburban and semi-rural communities. Full-time or part-time practices are available. No hospital call responsibilities.

In addition to competitive salaries, HealthPartners offers an excellent benefits package, including an employer-matched 401(k) and 457(b), generous personal time off, malpractice insurance coverage, and more.

Let us tell you more! Please forward your CV and cover letter to: [lori.m.fake@healthpartners.com](mailto:lori.m.fake@healthpartners.com), apply online at [healthpartners.com/careers](http://healthpartners.com/careers), or call 800-472-4695 x1. EOE

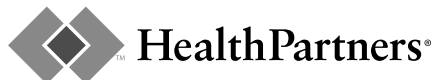

Published on behalf of the  
**Royal College of Psychiatrists**

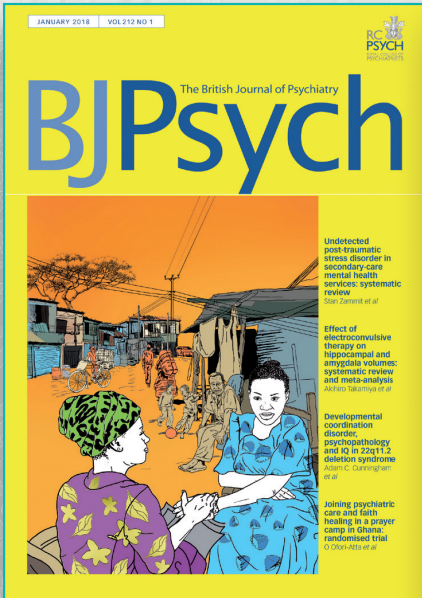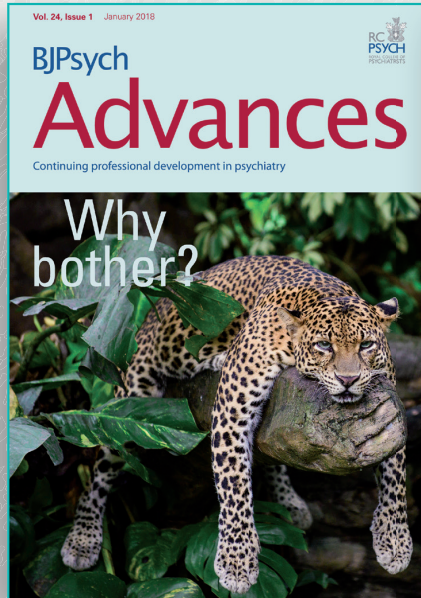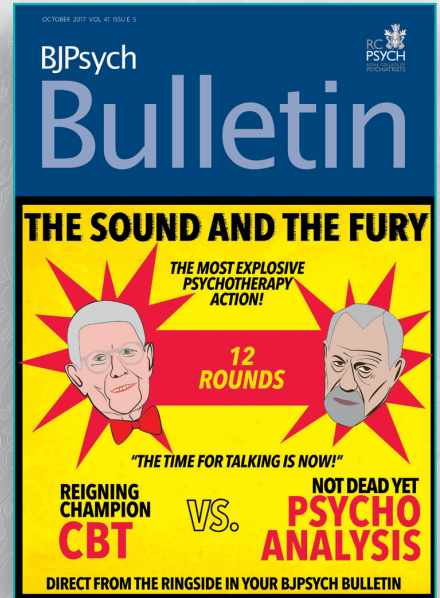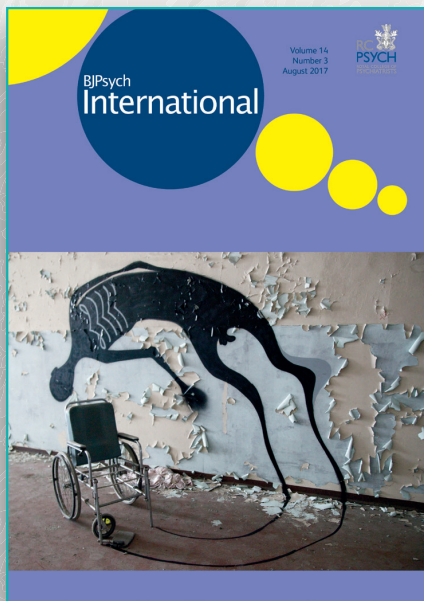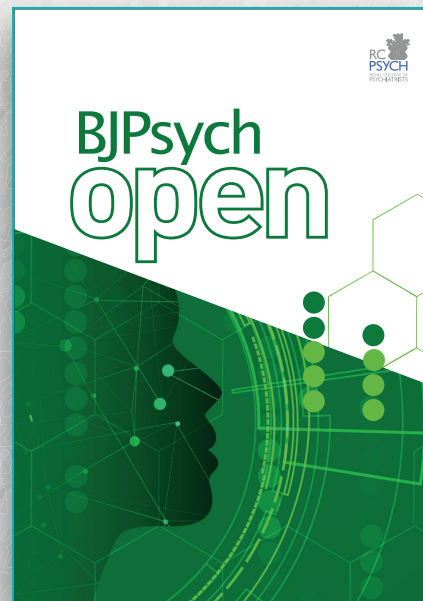

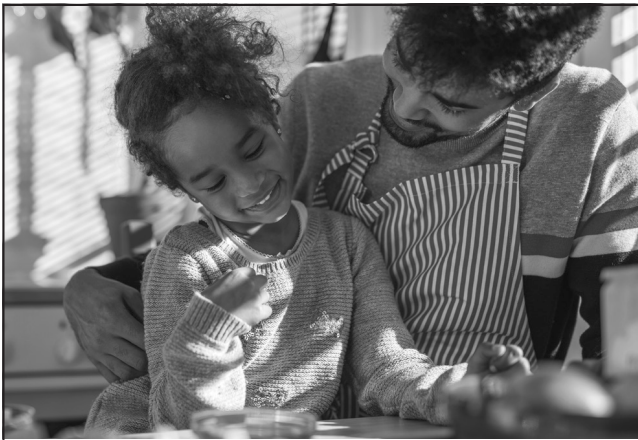

# COMING SOON!

## The NEW Brown Executive Function/Attention Scales

### **BROWN** EXECUTIVE FUNCTION/ATTENTION **SCALES™**

Take advantage of pre-publication pricing through December 31, 2018 by placing your order today at [PearsonClinical.com/BrownEFAScales!](http://PearsonClinical.com/BrownEFAScales!)

800.627.7271 | [PearsonClinical.com](http://PearsonClinical.com)

© 2018 Pearson Education, Inc. or its affiliates. All rights reserved. Pearson and Brown are trademarks, in the US and/or other countries, of Pearson plc. CLINA15777-16250 ML 10/18

ADHD is a complex impairment that impacts academic, social, emotional, and behavioral development for both children and adults. As an update to the widely used Brown ADD Scales™ the Brown EF/A Scales™ go beyond other measures to screen and assess a wider range of impairments of executive functioning and attention.

#### What makes Brown EF/A Scales different?

Based on Dr. Brown's Model of Executive Functions, the Brown EF/A Scales, includes DSM-5 symptoms of ADHD, helps address situational variability, and focuses on severity as opposed to frequency.

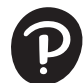

**Pearson**

# APA JobCentral

## The Career Hub for Psychiatry

### Manage Your Career

- Browse hundreds of active job listings!
- Create an account to save jobs, store multiple resumes and cover letters and communicate with employers through our internal messaging system.
- Set up multiple job alerts specifying your skills, interests and location to receive e-mails when employers post jobs that match your criteria.

### Recruit for Open Positions

- Post your job in front of thousands of highly qualified psychiatrists.
- Cross promote your job listing in *Psychiatric News*.
- Search the anonymous resume database to find your ideal candidate.

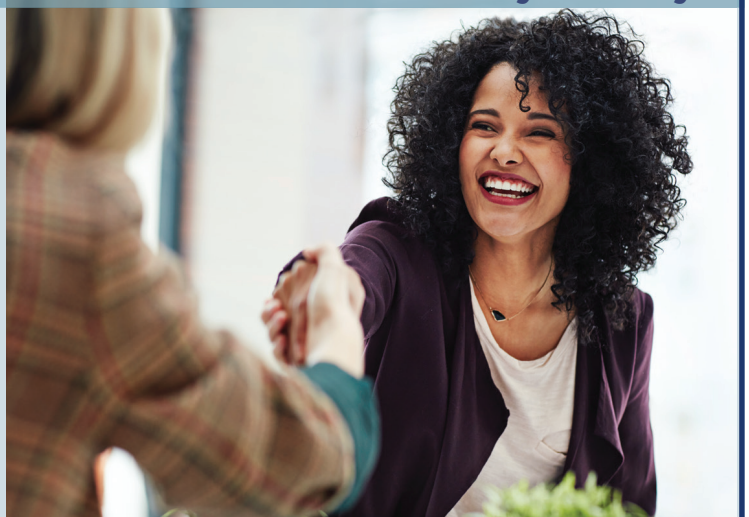

[jobs.psychiatry.org](http://jobs.psychiatry.org)

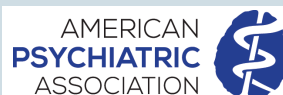

**JOBCENTRAL**  
The Career Hub for Psychiatry

AH1803A



## Subscription and Business Information

*The American Journal of Psychiatry*, ISSN 0002-953X, is published monthly by the American Psychiatric Association.

The American Psychiatric Association does not hold itself responsible for statements made in its publications by contributors or advertisers. Unless so stated, material in *The American Journal of Psychiatry* does not reflect the endorsement, official attitude, or position of the American Psychiatric Association or of the Journal's Editorial Board.

Periodicals postage paid at Washington, DC, and additional mailing offices. POSTMASTER: Send address changes to *The American Journal of Psychiatry*, Circulation Department, American Psychiatric Association, 800 Maine Avenue, S.W., Suite 900, Washington, D.C. 20024.

### Editorial Office

*American Journal of Psychiatry*  
American Psychiatric Association  
800 Maine Avenue, S.W., Suite 900  
Washington, D.C. 20024  
E-mail: [ajp@psych.org](mailto:ajp@psych.org)

### Customer Service

Phone: (800) 368-5777 (toll-free)  
E-mail: [appi@psych.org](mailto:appi@psych.org)

### APA Member Subscription Services

Phone: (888) 35-PSYCH (toll-free)

### Subscriptions

Per year: individual \$333.00,  
international \$500.00

Institutional subscriptions are tier priced. For institutional site license or pricing information, contact (202) 559-3729 or [institutions@psych.org](mailto:institutions@psych.org).

*Additional subscription options, including single issues and student rates*  
Contact Customer Service

### Advertising

*Pharmaceutical Print and Online Advertising*  
Frank Cox, Kathleen Harrison, Tim Wolfinger  
Pharmaceutical Media, Inc.  
30 East 33rd Street  
New York, NY 10016  
Phone: (212) 904-0379  
E-mail: [twolfinger@pminy.com](mailto:twolfinger@pminy.com)

### *Nonpharmaceutical and Online Sales*

Eamon Wood  
Pharmaceutical Media, Inc.  
E-mail: [ewood@pminy.com](mailto:ewood@pminy.com)  
(see address and phone above).

### Permissions and Reprints

Material published in the journals of the American Psychiatric Association and American Psychiatric Association Publishing is protected by copyright and all rights are reserved. Material may not be reproduced in any form or by any means without written permission from the copyright owner. For permission to reproduce material published by APA, please visit <http://www.appi.org/customer-service/permissions> for more information. Permission can also be secured through the Copyright Clearance Center ([www.copyright.com](http://www.copyright.com)).

APA does not require that permission be obtained for the photocopying of isolated articles for nonprofit classroom or library reserve use; all fees associated with such permission are waived. This consent does not extend to other kinds of copying, such as copying for general distribution, for advertising or promotional purposes, for creating new collective works, or for resale. Requests for commercial distribution should be directed to (202) 609-7075.

For bulk reprints, please contact Jane Cha, (202) 609-7075; e-mail: [jcha@psych.org](mailto:jcha@psych.org).

Indexed in Abstracts for Social Workers, Academic Abstracts, Biological Abstracts, Chemical Abstracts, Chicago Psychoanalytic Literature Index, Cumulative Index to Nursing Literature, Excerpta Medica, Hospital Literature Index, Index Medicus, International Nursing Index, Nutrition Abstracts, Psychological Abstracts, Science Citation Index, Social Science Source, and Social Sciences Index.

Pages are produced by Sheridan Journal Services (Waterbury, VT) and printed by Sheridan NH (Hanover, NH) on acid-free paper effective with Volume 169, Number 1, January 2012.

© 2018 American Psychiatric Association.



# Subscribe to Psychiatric Services today!

## Don't miss the December issue:

- Two Viewpoints on gun violence and suicide prevention
- A shared decision-making app to improve treatment engagement
- Recovery colleges and what makes them work

## Coming in the January issue:

- Open Dialogue: a review of the evidence
- Use of mental health services among U.S. college students
- A debate to repeal or retain the IMD exclusion rule

## One low price covers your print and online subscription.

\$ 121 APA Member print and online subscription

\$ 110 APA Member online-only subscription

## Coming Soon:

**Editor's Choice**—Sign up on the Publication Alerts page to receive alerts on curated, topical content. <http://appi.org/etocs>

## Listen to our podcast

**PSYCHIATRIC  
SERVICES**

FROM PAGES  
TO PRACTICE

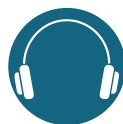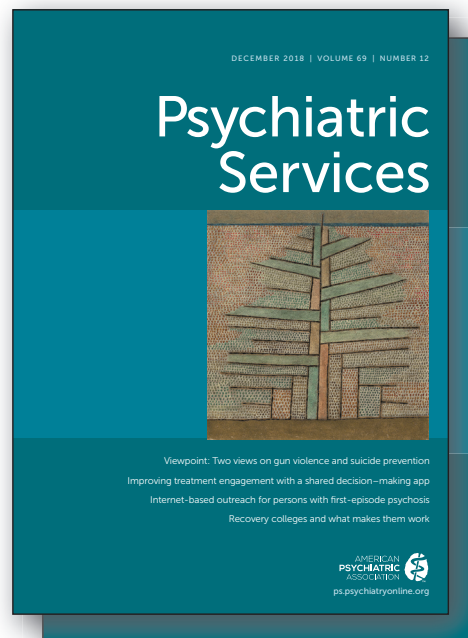

[ps.psychiatryonline.org](http://ps.psychiatryonline.org)

Subscribe today at [www.appi.org](http://www.appi.org) or call  
Customer Service at 1-800-368-5777.

AMERICAN  
PSYCHIATRIC  
ASSOCIATION  
PUBLISHING

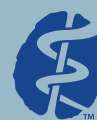

[www.appi.org](http://www.appi.org)

Priority Code AH1801OCT

#1 TMS CHOICE OF DOCTORS

DO YOU WANT

INNOVATION

OR

IMITATION?

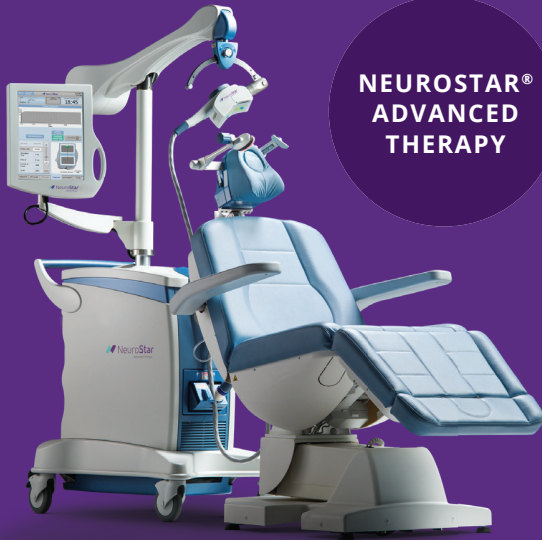

NEUROSTAR®  
ADVANCED  
THERAPY

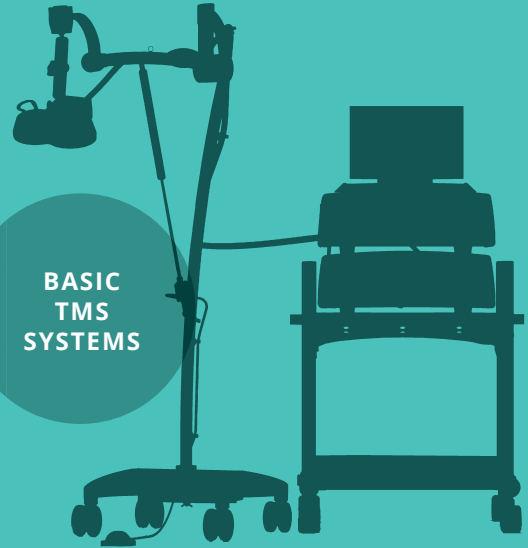

BASIC  
TMS  
SYSTEMS

YES

#1 TMS CHOICE OF DOCTORS

NO

YES

3D POSITIONING *ensures precise coil placement*

NO

YES

CONTACT SENSING *continuously monitors patient contact*

NO

YES

REAL-TIME FEEDBACK *relays treatment info and alerts to technicians*

NO

YES

MT ASSIST® *guides MT location and determines treatment dose*

NO

Unlike NeuroStar Advanced Therapy, basic TMS systems don't come close to providing the precision technology you need to help transform patients' lives.

**INDICATION**

NeuroStar® is indicated for the treatment of Major Depressive Disorder in adult patients who have failed to receive satisfactory improvement from prior antidepressant medication in the current episode.

**IMPORTANT INFORMATION**

The most common side effect is pain or discomfort at or near the treatment site. These events are transient; they occur during the TMS treatment course and do not

occur for most patients after the first week of treatment. NeuroStar Advanced Therapy should not be used with patients who have non-removable conductive metal in or near the head.

NeuroStar Advanced Therapy is available by prescription only. Please visit [NeuroStar.com](http://NeuroStar.com) for full safety and prescribing information.

**NeuroStar.com | 1-877-600-7555**

©2018 Neuronetics, Inc. 53-51466-000 Rev A

**RIGHT DOSE.  
RIGHT LOCATION.  
EVERY TIME.**

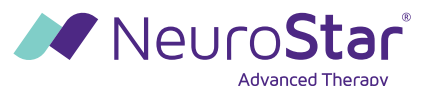

Source: https://ajp.psychiatryonline.org/doi/suppl/10.1176/ajp.2018.175.issue-12/suppl_file/back.pdf
