175<sup>th</sup> Year of Publication

DECEMBER 2018 | VOLUME 175 | NUMBER 12

# The American Journal of Psychiatry

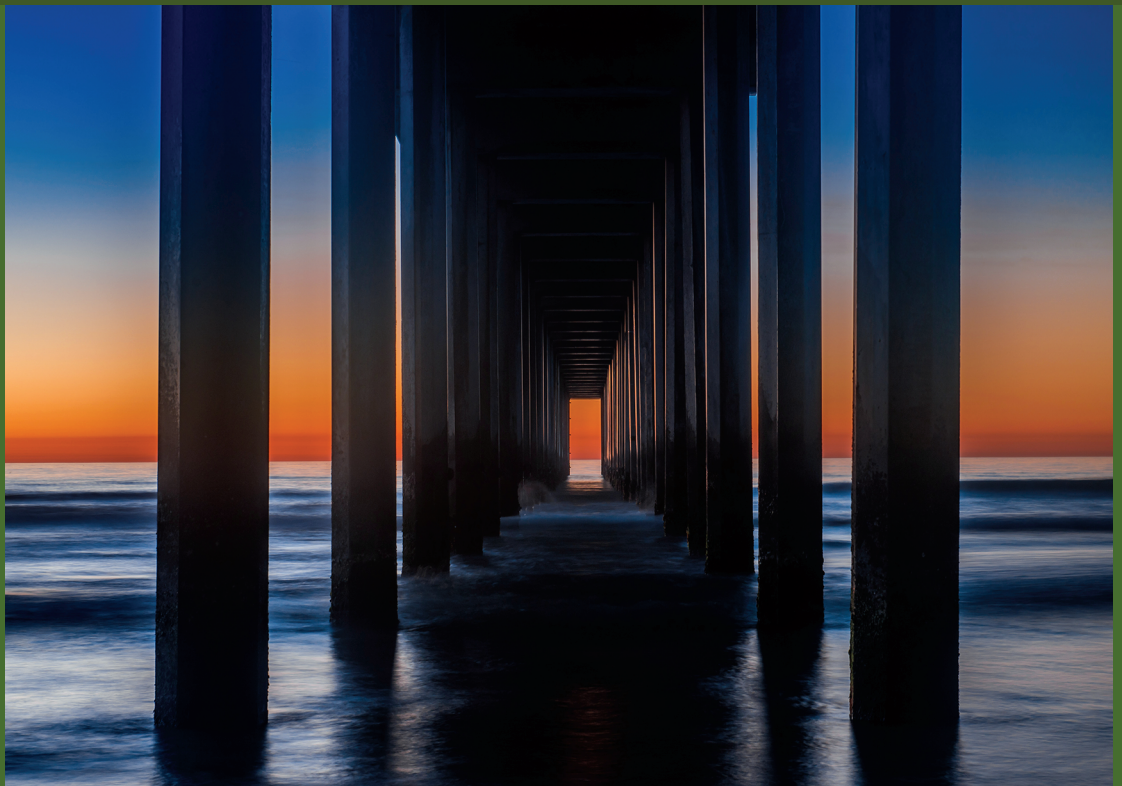

Improving Depression Outcome by Patient-Centered  
Medical Management

Integrating Health and Mental Health Services:  
A Past and Future History

Attenuation of Antidepressant Effects of Ketamine  
by Opioid Receptor Antagonism

Double-Blind Randomized Clinical Trial of Prazosin  
for Alcohol Use Disorder

AMERICAN  
PSYCHIATRIC  
ASSOCIATION

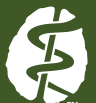

[ajp.psychiatryonline.org](http://ajp.psychiatryonline.org)
