## PERSPECTIVAS

### NOTA DEL EDITOR

**1155 Despedida** *Robert Freedman, M.D., Editor, 2006–2018* **AUDIO**

### EDITORIALES

**1157 ¿Realmente no hay nada nuevo bajo el sol? ¿La ketamina en dosis bajas es un antidepresivo de acción rápida simplemente porque es un opiáceo?** *Mark S. George, M.D.*

**1159 Prazosín para el tratamiento de los trastornos por consumo de alcohol** *Rajita Sinha, Ph.D.*

**1161 Evaluación precisa del riesgo de malformaciones mayores en infantes con exposición a la quetiapina en el primer trimestre** *Margaret G. Spinelli, M.D.*

**1163 2018 en perspectiva** *[The Editors]*

### INTROSPECCIÓN

**1167 Un resultado inesperado de la prueba de ADN para ancestros** *Kenneth L. Leetz, M.D.*

### TRATAMIENTO EN PSIQUIATRÍA

**1169 Perspectivas del manejo de la depresión vascular** *Warren D. Taylor, M.D., et al.* **EMC • AUDIO**

**1176 Cuando descontinuar los antidepresivos ISRS es un reto: Consejos para el manejo** *Manish K. Jha, M.D., et al.*

### IMÁGENES EN PSIQUIATRÍA

**1185 T.R. Beck (1791–1855)** *C.V. Haldipur, M.D.*

### REVISIÓN Y RESEÑAS

**1187 Mejora del resultado de la depresión por medio de la gestión médica centrada en el paciente**

*A. John Rush, M.D., Michael E. Thase, M.D.*

La baja adherencia a los medicamentos antidepresivos es una de las principales causas del fracaso del tratamiento para los pacientes depresivos. La gestión médica centrada en el paciente intenta alinear la psicoterapia del paciente con el objetivo de lograr una mejor adherencia a la medicación para obtener efectos óptimos del tratamiento.

**1199 Integrando los servicios de salud y los de salud mental: Una historia pasada y futura**

*Benjamin G. Druss, M.D., M.P.H., Howard H. Goldman, M.D., Ph.D.*

La Ley de Cuidado de Salud Asequible (*Affordable Care Act*) es el resultado de esfuerzos realizados durante décadas para desarrollar enfoques de salud clínicos, a nivel de servicio y públicos que integren de manera más completa los servicios mentales, médicos, de consumo de sustancias y sociales. Esta ley brinda oportunidades de seguir desarrollando esta tendencia histórica hacia una atención más integral.

## NUEVAS INVESTIGACIONES

### ARTÍCULOS

**1205 Atenuación de los efectos antidepresivos de la ketamina por antagonismo de los receptores de opiáceos**

*Nolan R. Williams, M.D., et al.* **EDITORIALE • VIDEO**

El efecto antidepresivo agudo de la ketamina intravenosa se bloqueó con naloxona en un ensayo cruzado de prueba de principio que comparó la naloxona versus el placebo en infusiones sucesivas de ketamina en pacientes deprimidos resistentes al tratamiento. Los autores concluyen que el mecanismo antidepresivo de la ketamina es similar al de otros opiáceos.

**1216 Ensayo clínico aleatorizado y doble ciego para el trastorno por consumo de alcohol**

*Tracy L. Simpson, Ph.D., et al.* **EDITORIALE • EMC • AUDIO**

Un ensayo de 12 semanas comparó el prazosín, un antagonista noradrenérgico alfa-1, y el placebo en pacientes dependientes del alcohol que no tenían TEPT. El grupo tratado con prazosín redujo el hábito de tomar en exceso y el número de bebidas por semana más rápidamente, pero a las 12 semanas ambos grupos eran similares.

**1225 Riesgo de malformaciones importantes en infantes después de la exposición a la quetiapina en el primer trimestre**

*Lee S. Cohen, M.D., et al.* **EDITORIALE**

El registro del *Massachusetts General Hospital* hizo seguimiento a 150 mujeres expuestas a la quetiapina durante el embarazo. El riesgo de malformación fetal importante no fue diferente del que se observa en los embarazos sin exposición a la quetiapina.

**1232 Discapacidad intelectual y trastornos psicóticos en los niños: Asociación a la enfermedad mental materna grave y a la exposición a complicaciones obstétricas en una cohorte de toda la población**

*Patsy Di Prinzio, M.Biostat., et al.* EMC • AUDIO

La enfermedad mental materna grave y la exposición a complicaciones obstétricas contribuyen por separado al riesgo de discapacidad intelectual en los niños. Sin embargo, la discapacidad intelectual aumenta aproximadamente 4 veces el riesgo de futuro trastorno psicótico.

**1243 Deterioro en el procesamiento del movimiento en esquizofrenia y el síndrome de psicosis atenuado: Implicaciones etiológicas y clínicas**

*Antígona Martínez, Ph.D., et al.* VIDEO

Las grabaciones electrofisiológicas y los datos de IRMf implican el procesamiento neural perturbado del movimiento tanto en pacientes con esquizofrenia como en los que están en alto riesgo. Los déficits se correlacionan con un reconocimiento emocional facial pobre, un signo comportamental temprano de psicosis inminente.

**1255 Variaciones tempranas en la microestructura de la sustancia blanca y resultado de depresión en adolescentes con depresión subumbral**

*Hélène Vulser, M.D., Ph.D., et al.*

En jóvenes de 14 años con depresión subumbral se encuentra una anisotropía fraccional baja y una difusividad radial alta en el cuerpo calloso anterior. Los que tenían menor conectividad entre el calloso y el cíngulo tuvieron mayor riesgo de diagnósticos depresivos a los 16 años.

**COMUNICADOS Y ACTUALIZACIONES**

**CARTAS AL EDITOR**

**1265 Una oportunidad para reportar hallazgos más cercanos a la eficacia en un estudio de lamotrigina para el trastorno límite de la personalidad** *Eric G. Smith, M.D., Ph.D.*

**1265 Ningún efecto de la lamotrigina en subgrupos de pacientes con trastorno límite de la personalidad**  
**Respuesta a Smith** *Mike J. Crawford, M.D., et al.*

**1266 La influencia de efectos de confusión no medidos en un estudio de discontinuación de antipsicóticos en el primer episodio de esquizofrenia** *Abhishek Ghosh, M.D., D.M., Dalton Noble, M.D.*

**1267 Riesgo de fracaso del tratamiento: Respuesta a Gosh y Noble** *Jari Tiihonen, M.D., Ph.D., et al.*

**RESEÑAS BIBLIOGRÁFICAS**

**1268 Psychodynamic Therapy of Personality Pathology: Treating Self and Interpersonal Functioning [Terapia psicodinámica de la patología de personalidad: Tratamiento del funcionamiento de uno mismo e interpersonal]** *Richard F. Summers, M.D.*

**1269 Narcissism and Its Discontents: Diagnostic Dilemmas and Treatment Strategies With Narcissistic Patients [Narcisismo y descontentos: Dilemas diagnósticos y estrategias de tratamiento con pacientes narcisistas]**  
*Jeffrey Katzman, M.D.*

**1270 Psychodynamic Approaches to Behavioral Changes [Enfoques psicodinámicos para los cambios comportamentales]** *Noa Heiman, Ph.D.*

**1271 Treatment of Severe Personality Disorders: Resolution of Aggression and Recovery of Eroticism [Tratamiento de los trastornos de personalidad graves: Resolución de agresión y recuperación del erotismo]** *Harvey Schwartz, M.D.*

**OTROS TEMAS DE INTERÉS**

**1274 Reviewers for The American Journal of Psychiatry**

**1279 Educación Médica Continuada**

**Cubierta:** [In this issue, Dr. Robert Freedman bids farewell as his Editorship concludes. The cover photo of Scripps Memorial Pier (La Jolla, Calif.) is courtesy of his longtime friend and first colleague in the field, Carlyle Chan, M.D., Professor of Psychiatry and the Institute for Health & Equity (Center for Bioethics & Medical Humanities), Medical College of Wisconsin, Milwaukee.]

**AUDIO** Article is highlighted in AJP Audio, a downloadable .mp3 file available at [ajp.psychiatryonline.org](http://ajp.psychiatryonline.org)

**EDITORIALE** Article is discussed in one of the issue's editorials

**EMC** A course covering the content of this article is available online for paid subscribers to the AJP CME Course program

**VIDEO** Article is highlighted online by Deputy Editor Daniel S. Pine, M.D.

**La Tabla de Contenidos y resúmenes de Este Número Está Disponible en Español**  
(Abstracts are also available in Spanish)

Translation presented in collaboration with the Office of Global Health, Rutgers-Robert Wood Johnson Medical School. Support for this effort provided by ACTA Colombia.

**Translation courtesy of**

**Sergi Casals, M.A.**, Garuna, Medellín, Colombia ([www.garunaeditors.com](http://www.garunaeditors.com))

**Carlos López Jaramillo, M.D., M.Sc., Ph.D.**, Universidad de Antioquia, Medellín, Colombia

**Javier I. Escobar, M.D., M.Sc.**, Rutgers-Robert Wood Johnson Medical School

## Mejora del resultado de la depresión por medio de la gestión médica centrada en el paciente

A. John Rush, M.D., Michael E. Thase, M.D.

Entre los retos que afectan profundamente el resultado del tratamiento de la depresión se encuentran: 1) la retención del paciente y su compromiso con la atención y la optimización de la adherencia al tratamiento, 2) la optimización del control de los síntomas y los efectos secundarios por medio de ajustes de la medicación utilizando procedimientos de atención basados en mediciones, 3) la restauración del funcionamiento diario y la calidad de vida y 4) la prevención, o como mínimo la mitigación, de la recaída o recurrencia sintomáticas. Según datos del estudio de alternativas de tratamiento secuenciadas para aliviar la depresión (*Sequenced Treatment Alternatives to Relieve Depression*), entre un 10% y un 15% de pacientes no volverán por el tratamiento después de una visita inicial de evaluación exhaustiva; entre un 20% y un 35% adicional no completarán el primer paso de tratamiento de la fase aguda, y entre un 20% y un 50% más no completarán 6 meses de tra-

tamiento de continuación. Entre los pacientes que se mantienen en el tratamiento, más del 50% muestran una adherencia baja. De este modo, la mayoría de los pacientes no superan los dos primeros retos. No existen enfoques psicológicos sistemáticos de amplio consenso para ninguno de esos cuatro retos principales. Los autores proponen una "gestión médica centrada en el paciente" para abordar cada uno de los cuatro retos, utilizando modelos y métodos psicoeducativos, comportamentales, cognitivos, interpersonales y dinámicos. Un énfasis renovado en el desarrollo y la evaluación de enfoques sistemáticos para superar estos desafíos clínicos comunes podría mejorar las oportunidades de recuperación del paciente y costo-efectividad del tratamiento.

(*Am J Psychiatry* 2018; 175:1187–1198)

### AJP A LOS 175 AÑOS

Recordando nuestro pasado mientras  
visualizamos nuestro futuro

#### Julio 1933 Psicoterapéutica en Stockbridge

Horace K. Richardson: "Frecuentemente, en las situaciones más sencillas, son necesarias muy pocas entrevistas para que él [el paciente] descubra por sí mismo qué parte de la maquinaria adaptativa no está funcionando y desarrolle una técnica para superar la mala adaptación a un nivel más satisfactorio en el futuro."

(*Am J Psychiatry* 1933; 90:45–56)

## Integrando los servicios de salud y los de salud mental: Una historia pasada y futura

Benjamin G. Druss, M.D., M.P.H., Howard H. Goldman, M.D., Ph.D.

Los autores revisan la historia moderna, la situación actual y los futuros prospectos de integración entre la atención en salud mental y la atención médica general en los Estados Unidos. La investigación y los nuevos modelos de tratamiento desarrollados en la década de 1980 y el principio de la década de 1990 ayudaron a informar la legislación federal, incluyendo la Ley de Paridad en la Salud Mental e Igualdad en la Adicción (*Mental Health Parity and Addiction Equity Act*) de 2008 y la Ley de Cuidado de Salud Asequible (*Affordable*

*Care Act*) de 2010, que a su vez están creando nuevas oportunidades para seguir integrando servicios. Los futuros esfuerzos deben basarse en estos fundamentos para desarrollar enfoques de salud clínicos, a nivel de servicio y públicos que integren de manera más completa los servicios mentales, médicos, de consumo de sustancias y sociales.

(*Am J Psychiatry* 2018; 175:1199–1204)

### **AJP A LOS 175 AÑOS** Recordando nuestro pasado mientras visualizamos nuestro futuro

#### **[July 1928: A President Takes Stock]**

Adolf Meyer: ["I sometimes feel that Einstein, concerned with the relativity in astronomy, has to deal with very simple facts as compared to the complex and erratic and multicontingent performances of the human microcosmos, the health, happiness and efficiency of which we psychiatrists are concerned with."]

(*Am J Psychiatry* 1928; 85(1):1–31)

## Atenuación de los efectos antidepresivos de la ketamina por antagonismo de los receptores de opiáceos

Nolan R. Williams, M.D., Boris D. Heifets, M.D., Ph.D., Christine Blasey, Ph.D., Keith Sudheimer, Ph.D., Jaspreet Pannu, B.S., Heather Pankow, B.S., Jessica Hawkins, B.S., Justin Birnbaum, M.D., David M. Lyons, Ph.D., Carolyn I. Rodriguez, M.D., Ph.D., Alan F. Schatzberg, M.D.

**Objetivo:** Además del antagonismo de los receptores n-metil-D-aspartato, la ketamina produce activación del sistema opiáceo. El objetivo de este estudio fue determinar si el antagonismo de receptores opiáceos antes de la administración de ketamina intravenosa atenúa sus efectos antidepresivos o disociativos agudos.

**Método:** En un estudio cruzado doble ciego que se propuso, de 30 adultos con depresión resistente al tratamiento, los autores realizaron un análisis provisional planeado después de estudiar 14 participantes, 12 de los cuales completaron ambas condiciones en orden aleatorizado: placebo o 50 mg de naltrexona antes de la infusión intravenosa de 0,5 mg/kg de ketamina. La respuesta se definió como una reducción  $\geq 50\%$  en la puntuación de la Escala de 17 ítems para la Evaluación de la Depresión de Hamilton en el día 1 después de la infusión.

**Resultados:** En el análisis provisional, siete de 12 adultos con depresión resistente al tratamiento cumplieron el criterio de respuesta durante la condición de ketamina más placebo. Las reducciones en las puntuaciones de las escalas HAM-D

de 6 y 17 ítems en los participantes en la condición de ketamina más naltrexona fueron significativamente inferiores que en los participantes en la condición de ketamina más placebo en los días 1 y 3 después de la infusión. Los análisis secundarios de todos los participantes que completaron las condiciones de placebo y naltrexona, independientemente de la contundencia de su respuesta a la ketamina, mostraron resultados similares. No hubo diferencias en la disociación inducida por la ketamina entre las dos situaciones. Dado que la naltrexona bloqueó drásticamente los efectos antidepresivos pero no los disociativos de la ketamina, se detuvo el ensayo en el análisis provisional.

**Conclusiones:** Los hallazgos sugieren que el efecto antidepresivo agudo de la ketamina requiere la activación del sistema opiáceo. Los efectos disociativos de la ketamina no están mediados por el sistema opiáceo ni parecen ser suficientes sin el efecto opiáceo para producir los efectos antidepresivos agudos de la ketamina en adultos con depresión resistente al tratamiento.

(*Am J Psychiatry* 2018; 175:1205–1215)

## Ensayo clínico aleatorizado y doble ciego para el trastorno por consumo de alcohol

Tracy L. Simpson, Ph.D., Andrew J. Saxon, M.D., Cynthia Stappenbeck, Ph.D., Carol A. Malte, M.S.W., Robert Lyons, Dana Tell, A.R.N.P., Steven P. Millard, Ph.D., Murray Raskind, M.D.

**Objetivo:** Los medicamentos actuales para el trastorno por consumo de alcohol no tienen como objetivo las vías noradrenérgicas cerebrales. La evidencia teórica y pre-clínica sugiere que los circuitos noradrenérgicos pueden estar implicados en el refuerzo del alcohol y en la recaída en el hábito de consumirlo. Después de un estudio piloto positivo, los autores pusieron a prueba el antagonista del receptor adrenérgico alfa-1 prazosín para tratar el trastorno por consumo de alcohol en una muestra más grande.

**Método:** Noventa y dos participantes con trastorno por consumo de alcohol pero sin trastorno por estrés postraumático fueron asignados aleatoriamente para recibir prazosín o placebo en un estudio doble ciego de 12 semanas. Al inicio del estudio se ajustó la medicación, y al final de la semana 2 el horario de dosificación quedó establecido como: 4 mg en la mañana, 4 mg en la tarde y 8 mg a la hora de acostarse. La plataforma comportamental fue la gestión médica. Los participantes brindaron diariamente datos sobre el consumo de alcohol. Se utilizaron modelos lineales generalizados de efectos mixtos para examinar el impacto del prazosín en comparación con el placebo en el número de bebidas por semana, el número de días a la semana en que se consumió

alcohol y el número de días por semana en los que se consumió alcohol en exceso.

**Resultados:** Ochenta participantes completaron el periodo de ajuste y se incluyeron en los análisis primarios. Hubo una interacción significativa entre la condición y la semana tanto para el número de bebidas como para el número de días en los que se bebió en exceso, de modo que la tasa de consumo de alcohol y la probabilidad de beber en exceso mostraron una mayor reducción con el tiempo para los participantes en la condición de prazosín en comparación con aquellos en la condición de placebo. La probabilidad de que los participantes reportaran mareo y edema fue más alta para los participantes en la condición de prazosín que para los de la condición de placebo.

**Conclusiones:** El prazosín es prometedor como tratamiento farmacológico en la reducción del daño inducido por el trastorno por consumo de alcohol y merece ser evaluado con mayor detalle por otros grupos de investigación.

*(Am J Psychiatry 2018; 175:1216–1224)*

## Riesgo de malformaciones importantes en infantes después de la exposición a la quetiapina en el primer trimestre

Lee S. Cohen, M.D., Lina Góez-Mogollón, M.D., M.Sc., Alexandra Z. Sosinsky, B.S., Gina M. Savella, B.S., Adele C. Viguera, M.D., M.P.H., David Chitayat, M.D., Sonia Hernández-Díaz, Dr.P.H., Marlene P. Freeman, M.D.

**Objetivo:** Los antipsicóticos de segunda generación normalmente se prescriben a mujeres en edad reproductiva para el tratamiento de un espectro de trastornos psiquiátricos. La quetiapina es el medicamento más comúnmente prescrito en esta clase y por lo tanto es esencial un mejor entendimiento del perfil de seguridad reproductiva. El objetivo de este estudio fue determinar el riesgo de malformaciones importantes en los infantes expuestos a la quetiapina durante el embarazo en comparación con un grupo de infantes cuyas madres tenían un historial de morbilidad psiquiátrica pero que no tomaron antipsicóticos de segunda generación durante el embarazo.

**Método:** El registro nacional de embarazos para antipsicóticos atípicos (*National Pregnancy Registry for Atypical Antipsychotics*) entrevista a mujeres en embarazo de entre 18 y 45 años durante el embarazo y el período postparto. Se revisaron informes de obstetricia, de trabajo de parto y de parto e informes médicos de los primeros 6 meses de vida para encontrar evidencia de malformaciones importantes, que posteriormente fueron determinadas por un dismorfólogo que se mantuvo ciego al tipo de tratamiento. Las mujeres con exposición a la quetiapina en el primer semestre se compararon con los sujetos control sin exposición a antipsicóticos de segunda generación.

**Resultados:** En marzo de 2017, 888 mujeres se habían inscrito y 357 fueron aptas para el análisis. De estas, 152 mujeres con exposición a la quetiapina en el primer semestre se compararon con 205 sujetos control sin ninguna exposición a antipsicóticos de segunda generación. En los 155 infantes hijos de mujeres en el grupo expuesto (incluyendo tres pares de gemelos), se confirmaron dos malformaciones importantes (1,3%), en comparación con tres malformaciones importantes en los 210 infantes que nacieron en el grupo no expuesto (incluyendo cinco pares de gemelos) (1,4%). El *odds ratio* no ajustado para las malformaciones importantes en los infantes con y sin exposición a la quetiapina fue 0,90 (IC95%=0,15 a 5,46), lo que es consistente con el estimado agrupado de los datos controlados disponibles sobre la exposición fetal a la quetiapina.

**Conclusiones:** Estos datos referentes a la seguridad de la exposición fetal a la quetiapina en una muestra pequeña de participantes bien caracterizados son alentadores, dado que el intervalo de confianza no excede un riesgo de malformaciones importantes cinco veces mayor en relación a los sujetos psiquiátricos de control. Se obtendrán estimados más precisos de futuros análisis basados en la recolección constante de datos.

(*Am J Psychiatry* 2018; 175:1225–1231)

## Discapacidad intelectual y trastornos psicóticos en los niños: Asociación a la enfermedad mental materna grave y exposición a complicaciones obstétricas en una cohorte de toda la población

Patsy Di Prinzio, M.Biostat., Vera A. Morgan, M.Soc.Sc., Ph.D., Jonas Björk, Ph.D., Maxine Croft, Ph.D., Ashleigh Lin, Ph.D., Assen Jablensky, M.D., D.M.Sc., Thomas F. McNeil, Ph.D.

**Objetivo:** Los hijos de madres con enfermedades mentales graves tienen un riesgo significativamente mayor de desarrollar discapacidad intelectual. Las complicaciones obstétricas también están implicadas en el riesgo de discapacidad intelectual. Además, los hijos de madres con enfermedades mentales graves tienen mayor probabilidad de estar expuestos a complicaciones obstétricas. El objetivo de este estudio fue examinar las contribuciones, por separado y conjuntamente, de las enfermedades mentales familiares graves y de las complicaciones obstétricas al riesgo de discapacidad intelectual.

**Método:** La vinculación de registros de toda la población de Australia Occidental con datos de psiquiatría, pacientes internos, nacimientos y parteras identificaron 15.351 niños nacidos entre 1980 y 2001 de madres con enfermedades mentales graves y 449.229 niños de madres sin ninguna enfermedad mental. Se ajustaron modelos multivariados para el estado psiquiátrico de las madres, la discapacidad intelectual de las madres y otras co-variables familiares y sociodemográficas.

**Resultados:** El riesgo de discapacidad intelectual fue más elevado en los niños de madres con enfermedades mentales

graves en comparación con los niños con madres no afectadas. El impacto varió en los grupos de diferente diagnóstico materno. Para los hijos de madres con esquizofrenia, el *odds ratio* no ajustado fue 3,8 (IC 95%=3,0 a 4,9) y siguió siendo significativo después del ajuste simultáneo para exposición a complicaciones obstétricas y otras co-variables (*odds ratio*=1,7, IC 95%=1,3 a 2,3). El *odds ratio* para la exposición a las complicaciones obstétricas también siguió siendo significativo después del ajuste (*odds ratio*=1,7; IC 95%=1,6 a 1,8). Para la discapacidad intelectual de base genética, el *odds ratio* ajustado para la esquizofrenia materna fue elevado, pero no significativo estadísticamente. De los niños con discapacidad intelectual, 4,2% posteriormente desarrollaron un trastorno psicótico, en comparación con el 1,1% de los niños sin discapacidad intelectual.

**Conclusiones:** La enfermedad mental materna grave y la exposición a complicaciones obstétricas contribuyen por separado al riesgo de discapacidad intelectual, lo que sugiere vías causales potencialmente distintas.

(*Am J Psychiatry* 2018; 175:1232–1242)



# Deterioro en el procesamiento del movimiento en esquizofrenia y el síndrome de psicosis atenuado: Implicaciones etiológicas y clínicas

Antígona Martínez, Ph.D., Pablo A. Gaspar, M.D., Ph.D., Steven A. Hillyard, Ph.D., Søren K. Andersen, Ph.D., Javier Lopez-Calderon, Ph.D., Cheryl M. Corcoran, M.D., Ph.D., Daniel C. Javitt, M.D., Ph.D.

**Objetivo:** La capacidad de percibir el movimiento de los objetos biológicos, como caras, es un componente crítico de la función diaria y está correlacionado con la capacidad de desenvolverse en situaciones sociales (cognición social). Los déficits en la percepción del movimiento en esquizofrenia se demostraron por primera vez hace aproximadamente 20 años, pero los estudios al respecto siguen siendo insuficientes, especialmente sobre los estadios tempranos, potencialmente prodrómicos, de la enfermedad. Los autores examinaron la base neural de los deterioros en el procesamiento sensitivo visual, incluyendo el movimiento, en pacientes con esquizofrenia (N=63) y psicosis atenuada (alto riesgo clínico) (N=32) en comparación con sujetos sanos de control de las mismas edades (N=67).

**Método:** Se analizaron grabaciones electrofisiológicas hechas durante el procesamiento de estímulos y movimiento utilizando enfoques oscilatorios (frecuencia de tiempo) que diferenciaban la actividad evocada por el movimiento, de las respuestas evocadas por el estímulo sensorial. Estas se compararon con medidas de IRM funcional (IRMf) del procesamiento del movimiento.

**Resultados:** Se observaron déficits significativos en el procesamiento del movimiento en los dos grupos de pacientes, y

estos déficits predijeron deterioros tanto en el reconocimiento de movimiento facial como en la función cognitiva. En contraste con el procesamiento del movimiento, se observó que las respuestas evocadas sensorialmente por el inicio del estímulo intactas en los pacientes con psicosis atenuada y, además, el déficit relativo en las respuestas al inicio del movimiento en comparación con las respuestas al inicio del estímulo predijo una transición a la esquizofrenia. En pacientes con esquizofrenia, los déficits en la detección de movimiento estuvieron relacionados con la activación deteriorada en la corteza visual sensible al movimiento durante la IRMf. Otros deterioros visuales en pacientes con esquizofrenia, que no estuvieron presentes en pacientes con psicosis atenuada, implicaron otras regiones visuales, incluyendo el giro occipital medio y el núcleo talámico pulvinar.

**Conclusiones:** Los hallazgos del estudio ponen de relieve la importancia de la disfunción visual de nivel sensorial en la etiología de la esquizofrenia y en la experiencia personal de los individuos con el trastorno y demuestran que los déficits en el procesamiento del movimiento pueden preceder el inicio de la enfermedad y contribuir a la función deteriorada incluso en pacientes con psicosis atenuada.

(*Am J Psychiatry* 2018; 175:1243–1254)

## Variaciones tempranas en la microestructura de la sustancia blanca y resultado de depresión en adolescentes con depresión subumbral

Hélène Vulser, M.D., Ph.D., Marie-Laure Paillère Martinot, M.D., Ph.D., Eric Artiges, M.D., Ph.D., Ruben Miranda, M.Psych., Jani Penttilä, M.D., Ph.D., Yvonne Grimmer, M.D., Betteke M. van Noort, M.S.C., Argyris Stringaris, M.D., Ph.D., Maren Struve, Ph.D., Tahmine Fadai, M.D., Viola Kappel, Ph.D., Robert Goodman, Ph.D., F.R.C.Psych., Eleni Tzavara, M.D., Ph.D., Charbel Massaad, Ph.D., Tobias Banaschewski, M.D., Ph.D., Gareth J. Barker, Ph.D., Arun L.W. Bokde, Ph.D., Uli Bromberg, M.D., Rüdiger Brühl, Ph.D., Christian Büchel, M.D., Anna Cattrell, Ph.D., Patricia Conrod, Ph.D., Sylvane Desrivieres, Ph.D., Herta Flor, Ph.D., Vincent Frouin, Ph.D., Juergen Gallinat, M.D., Hugh Garavan, Ph.D., Penny Gowland, Ph.D., Andreas Heinz, M.D., Frauke Nees, Ph.D., Dimitri Papadopoulos-Orfanos, Ph.D., Tomas Paus, M.D., Ph.D., Luise Poustka, M.D., Sarah Rodehacke, Ph.D., Michael N. Smolka, M.D., Henrik Walter, M.D., Ph.D., Robert Whelan, Ph.D., Gunter Schumann, M.D., Jean-Luc Martinot, M.D., Ph.D., Hervé Lemaitre, Ph.D., for the IMAGEN Consortium

**Objetivo:** Las alteraciones en la microestructura de la sustancia blanca recientemente se han asociado a los episodios depresivos durante la adolescencia, pero no se sabe si preceden a la depresión. Los autores investigaron si la depresión subumbral en la adolescencia está asociada a las variaciones en la microestructura de la sustancia blanca y si éstas están relacionadas con el resultado de la depresión.

**Método:** Se compararon adolescentes con depresión subumbral (N=96) y sujetos sanos de control (N=336) de una cohorte basada en la comunidad, utilizando imágenes de tensor de difusión y estadística espacial basada en tractos (TBSS) de todo el cerebro, cuando los sujetos tenían 14 años para evaluar la microestructura de la sustancia blanca. Se les hizo seguimiento cuando tenían 16 años para evaluar la depresión. Se utilizó tractografía probabilística para reconstruir las fibras de la sustancia blanca que salían de las regiones identificadas en el análisis con TBSS y en sistemas implicados en la regulación emocional, el fascículo uncinado y el cíngulo. Los autores buscaron efectos mediadores de la microestructura de la sustancia blanca en la relación entre la depresión subumbral al inicio del estudio y la depresión en el

seguimiento, y luego exploraron la especificidad de los hallazgos.

**Resultados:** Se encontró anisotropía fraccional (FA) baja y difusividad radial alta en el cuerpo caloso anterior en los adolescentes con depresión subumbral. El análisis de tractografía mostró que también tenían menor FA en las fibras del cíngulo derecho, y menor FA y mayor difusividad media en los tractos que conectan el cuerpo caloso a la corteza cingulada anterior. La relación entre la depresión subumbral al inicio y la depresión en el seguimiento estuvo mediada por valores de FA en los segundos tractos, y los valores de FA inferiores en los tractos predijeron claramente un riesgo individual más alto de depresión.

**Conclusiones:** Las variaciones tempranas de FA en los tractos que se proyectan del cuerpo caloso a la corteza cingulada anterior pueden denotar un mayor riesgo de transición a la depresión en los adolescentes.

(*Am J Psychiatry* 2018; 175:1255–1264)
