# Psychiatrists Professional Liability Insurance

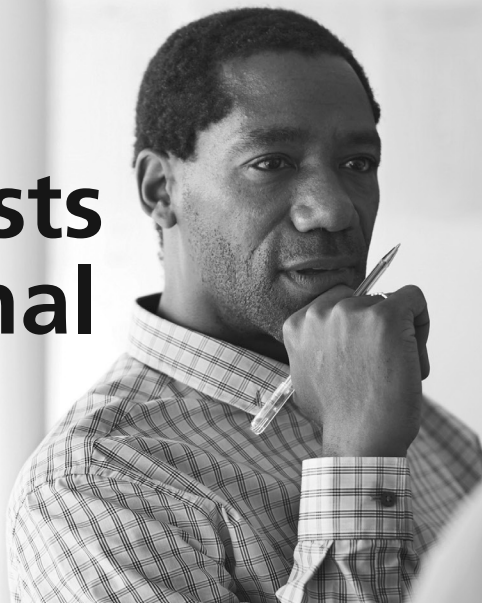

## Discounts Offered Include:

- 15% NEW POLICYHOLDER DISCOUNT\***  
(must be claims free for the last 6 months)
- Up to 50% New Doctor Discount** (for those who qualify)
- 10% Claims Free Discount** (for those practicing 10 years, after completion of training, and remain claims free)
- 50% Resident-Fellow Member Discount**
- 15% Child and Adolescent Psychiatrist Discount** (for those whose patient base is more than 50% children and adolescents)
- 50% Part-time Discount** (for up to 20 client hours a week or less)
- 5% Risk Management Discount** (for 3 hours of CME)

*\*Where allowable by law and currently not available in AK or NY.  
(Above Discounts and Coverage Features are subject to individual state approval.)*

**40**  
YEARS

For over 40 years we have provided exceptional protection and have a reputation for outstanding customer service. Our extensive years of experience and industry knowledge allows us to help you by providing worry free coverage so you can concentrate on what you do best – helping people help themselves. When it comes to caring about people, we have a lot in common.

## Our Psychiatrists Professional Liability Program Provides:

- Limits up to \$150,000 in Defense Expenses related to Licensing Board Hearings and other Proceedings
- Up to \$150,000 in Fire Legal Liability Coverage
- Up to \$100,000 in Medical Payments for Bodily Injury
- Up to \$25,000 for First Party Assault and Battery Coverage
- Up to \$25,000 for Information Privacy Coverage (HIPAA)
- Up to \$15,000 in Emergency Aid Coverage
- Insured's Consent to Settle required in the settlement of any claim – No arbitration clause
- Telepsychiatry, ECT, Forensic Psychiatry Coverage
- Risk Management Hotline with 24/7 Service for Emergencies

Visit us at [apamalpractice.com](http://apamalpractice.com) or call **877.740.1777** to learn more.

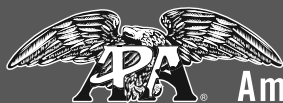

**American Professional Agency**

LEADERS IN PSYCHIATRIC MEDICAL LIABILITY INSURANCE

Endorsed by:

AMERICAN  
PSYCHIATRIC  
ASSOCIATION

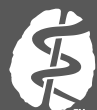

# THE AMERICAN PSYCHIATRIC ASSOCIATION

800 Maine Avenue, S.W., Suite 900, Washington, D.C. 20024

(888) 357-7924 (toll-free inside the U.S. and Canada)

web site: [www.psychiatry.org](http://www.psychiatry.org) • e-mail: [apa@psych.org](mailto:apa@psych.org)

## Chairpersons of Councils, Committees, and Task Forces

### Standing Committees

|                             |                             |
|-----------------------------|-----------------------------|
| <b>Bylaws</b>               | Esperanza Diaz, M.D.        |
| <b>Elections</b>            | Joseph A. Cheong, M.D.      |
| <b>Ethics</b>               | Ezra E.H. Griffith, M.D.    |
| <b>Finance and Budget</b>   | Ann Marie T. Sullivan, M.D. |
| <i>Audit</i>                | Gregory W. Dalack, M.D.     |
| <i>Investment Oversight</i> | David Fassler, M.D.         |
| <b>Joint Reference</b>      | Bruce J. Schwartz, M.D.     |
| <b>Membership</b>           | William Arroyo, M.D.        |
| <b>Nominating</b>           | Anita S. Everett, M.D.      |
| <b>Tellers</b>              | Jose P. Vito, M.D.          |

### Non-Standing Committee

|                             |                              |
|-----------------------------|------------------------------|
| <b>Conflict of Interest</b> | Philip R. Muskin, M.D., M.A. |
|-----------------------------|------------------------------|

### Councils

#### Council on Addiction Psychiatry

Andrew J. Saxon, M.D.

#### Council on Advocacy and Government Relations

Patrick S. Runnels, M.D.

*Advocacy and Litigation Funding*

Bhasker J. Dave, M.D.

#### Council on Children, Adolescents, and Their Families

Gabrielle Shapiro, M.D.\*

#### Council on Communications

Carol A. Bernstein, M.D.

#### Council on Consultation-Liaison Psychiatry

David F. Gitlin, M.D.

#### Council on Geriatric Psychiatry

Robert P. Roca, M.D.

#### Council on Healthcare Systems and Financing

Harsh K. Trivedi, M.D.

*Integrated Care*

Ken C. Hopper, M.D.

*RBRVS, Codes and Reimbursement*

Gregory G. Harris, M.D.

*Reimbursement for Psychiatric Care*

Laurence H. Miller, M.D.

*Telepsychiatry*

James H. Shore, M.D.

#### Council on International Psychiatry

Bernardo Ng, M.D.

*Chester Pierce Human Rights Award Committee*

James L. Griffith, M.D.

#### Council on Medical Education and Lifelong Learning

Mark H. Rapaport, M.D.

*Scientific Program*

Jacqueline M. Feldman, M.D.

*Scientific Program—IPS (Oct. to Oct. tenure)*

Eric Yarbrough, M.D.

*Vestermark Award Committee*

Lowell D. Tong, M.D.

#### Council on Minority Mental Health and Health Disparities

Christina V. Mangurian, M.D.

#### Council on Psychiatry and Law

Debra A. Pinals, M.D.

*Judicial Action*

Marvin S. Swartz, M.D.

#### Council on Quality Care

Grayson S. Norquist, M.D.

*Mental Health Information Technology*

Brent Nelson, M.D.

*Quality and Performance Measurement*

Carol Alter, M.D.\*

*Practice Guidelines*

Daniel J. Anzia, M.D.

#### Council on Research

Dwight L. Evans, M.D.

*Psychiatric Dimensions of Disasters*

Joshua C. Morganstein, M.D.

\* Has served in role since conclusion of APA Annual Meeting, May 2018. Previous issues of the *Journal* had not updated the position holder.

# The American Journal of Psychiatry Residents' Journal

[ajp.psychiatryonline.org/loi/ajp-rj](http://ajp.psychiatryonline.org/loi/ajp-rj)

## November 2018

- 2 Suffering in Silence: Mental Health Stigma and Physicians' Licensing Fears**  
Swapnil S. Mehta, B.A., Matthew L. Edwards, M.D.  
*Examining the impact of poor self-health on patient care*
- 5 The American Society of Clinical Psychopharmacology Model Curriculum**  
Aimee Dereczyk, M.D.  
*Highlighting the didactics*
- 6 A Neuropsychiatric Presentation of Multiple Sclerosis**  
Joshua Ryan Smith, M.D., Diana M. Robinson, M.D.  
*Assessing comorbidity with psychiatric conditions, such as bipolar disorder, mania, and psychosis*
- 9 The Importance of Evaluating Sexual History in the Elderly**  
Khushminder Chahal, M.D.  
*Exploring misconceptions about older-age populations*
- 10 The Malady The Doctor Missed**  
Lauren M. Weinand, B.A.  
*Reflecting on grief, loss, disease, and death as well as the patient-physician relationship*
- 11 Residents' Resources**
- 12 Information for Authors**
- 12 Upcoming Themes**

**The Residents' Journal** is an e-publication that serves as a forum for sharing ideas and experiences in training, clinical practice, research, and careers.

**The Residents' Journal** considers manuscripts authored by medical students, resident physicians, and fellows. For information about submitting manuscripts, visit the **Author Resources** page online: [https://ajp.psychiatryonline.org/residents\\_journal/rj\\_ifora](https://ajp.psychiatryonline.org/residents_journal/rj_ifora).

## 2018–2019 Editorial Board

**Editor-in-Chief:** Oliver Glass, M.D.

**Senior Deputy Editor:** Shapir Rosenberg, M.D.

**Deputy Editor:** Matthew Edwards, M.D.

**Deputy Editor:** Anna Kim, M.D.

**Deputy Editor/Podcast Editor:**  
Lindsay Lebin, M.D.

**Associate Editors:** Carol Chan, M.D.  
Alexander Cole, M.D.  
Jason Garner, M.D., J.D.  
David Latov, M.D.  
Elon Richman, M.D.

**Culture Editor:** Erik Bayona, M.D.

**Culture Editor/Social Media Editor:**  
Somya Abubucker, M.D.

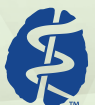

# Go Online

Visit [ajp.psychiatryonline.org](http://ajp.psychiatryonline.org) for these features!

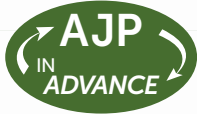

## AJP in Advance

*Discover the latest research advances before they appear in print*

### **Multimodal Structural Neuroimaging Markers of Brain Development and ADHD Symptoms**

A relatively large body of brain-imaging research examines children with attention deficit hyperactivity disorder (ADHD). For this research to be clinically useful, multi-variate methods are needed that can combine many pieces of information into clinically meaningful data. Gareth Ball and colleagues use such a multivariate approach in an attempt to begin generating clinically useful imaging measures in more than 250 children. Their results provide the beginnings of a path that may one day lead to clinically-informative imaging in ADHD.

### **Electroencephalographic Biomarkers for Treatment Response Prediction in Major Depressive Illness: A Meta-Analysis**

Because electroencephalography (EEG) is relatively inexpensive, researchers have sought to generate EEG-based measures of treatment outcome for major depressive disorder. Alik S. Widge and colleagues report data from a quantitative meta-analysis from 76 articles examining this issue. Their results suggest that the commonly used EEG techniques employed by these studies are not sufficiently well-developed to support their clinical use in predicting treatment outcome. The authors outline methods for addressing this shortcoming.

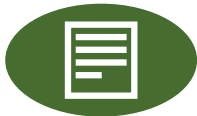

## AJP CME

*Earn CME credit: 3 courses per issue*

This month's courses appear on pages 1279–1282. Each short course is based on one article in this issue and can earn up to 1 *AMA PRA Category 1 Credit™*. CME credit is issued only **online**, and a paid subscription to AJP's CME course program is required.

Visit [psychiatryonline.org/cme](http://psychiatryonline.org/cme) and click on the "American Journal of Psychiatry" tab.

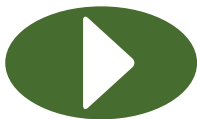

## AJP Multimedia

*Access Audio or Video for highlights of each issue*

In AJP Audio this month, outgoing Editor-in-Chief Robert Freedman, M.D., reflects on his tenure as Editor of the *Journal*. Executive Editor Michael Roy reviews research on the management of vascular depression, the use of prazosin for alcohol use disorder, and how maternal severe mental illness and exposure to obstetric complications are associated with intellectual disability and psychotic disorders in children.

In this month's video, Deputy Editor Daniel S. Pine, M.D., discusses the articles "Impaired Motion Processing in Schizophrenia and the Attenuated Psychosis Syndrome: Etiological and Clinical Implications" and "Attenuation of Antidepressant Effects of Ketamine by Opioid Receptor Antagonism."

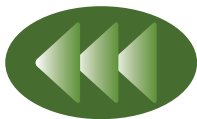

## History of Psychiatry

*Revisit the field's rich history through the pages of AJP*

### **50 Years Ago this Month: Therapeutic Abortion**

A little more than 4 years before the *Roe v. Wade* decision, three articles present an array of viewpoints: a review of abortion practices in other parts of the world to provide background for considering the practice in the United States, a look at attitudes toward the practice, and the effects of a then "newly liberalized abortion law" in Colorado.

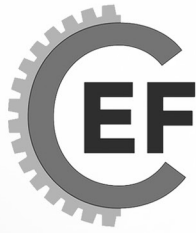

# Comprehensive Executive Function Inventory

Jack A. Naglieri, Ph.D. & Sam Goldstein, Ph.D.

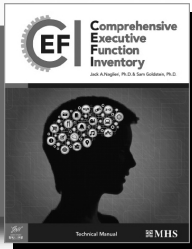

## Executive Function Scores You Can Trust!

**The most representative nationally normed behavior rating scale of executive function.**

The CEFI™ provides a comprehensive evaluation of executive function strengths and weaknesses in youth aged 5 to 18 years.

- **Accurate Results:** Normative samples are within 1% of U.S. Census targets for an accurate representation of the U.S. population.
- **Easy to Understand Reports:** Generate three types of dynamic reports including a Comparative Report by comparing results from multiple rater forms (Parent, Teacher, and Self).
- **Strategies for Intervention:** Utilize the CEFI's nine scales to pinpoint targets for intervention.
- **Save Time:** Assess, score, and report from anywhere with the safe and secure MHS Online Assessment Center.

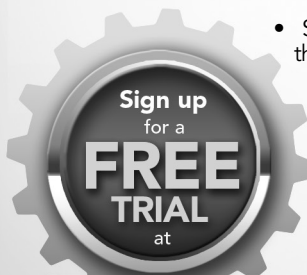

**MHS.com/CEFI**

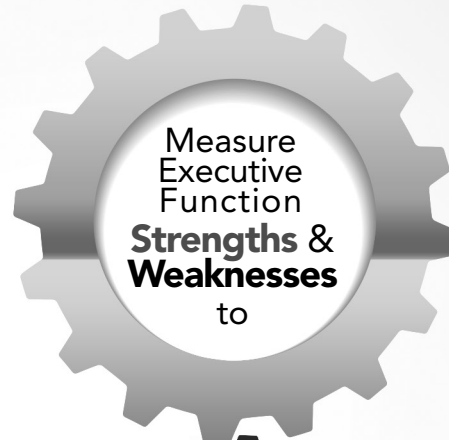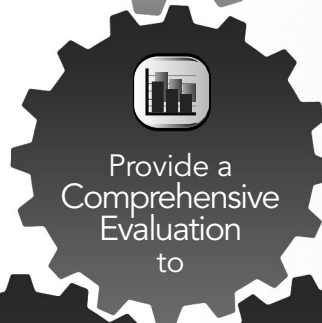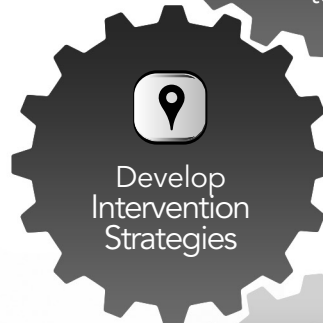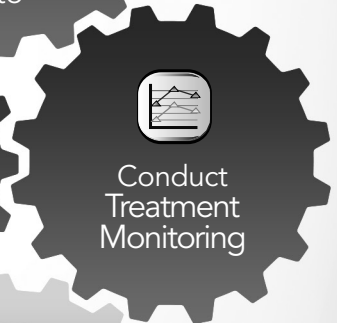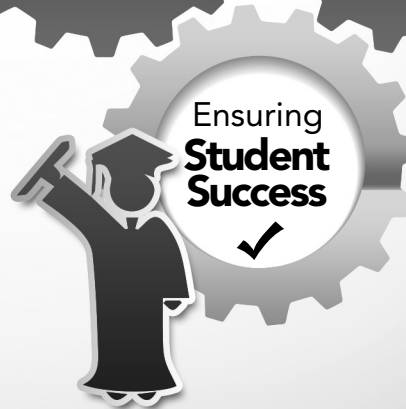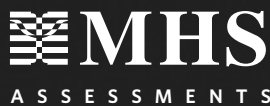

**Multi-Health Systems Inc.**

USA Tel: 1.800.456.3003 / CAN Tel: 1.800.268.6011  
mhs.com • customerservice@mhs.com

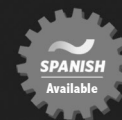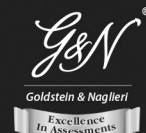

Source: https://psychiatryonline.org/doi/suppl/10.1176/ajp.2018.175.issue-12/suppl_file/front.pdf
